# Supplementary material for: Strong Dispersal Limitation of Microbial Communities at Shackleton Glacier, Antarctica
Source: PubMed Central journal article supplement (PMC9948728; doi:10.1128/msystems.01254-22), 2023-01-31

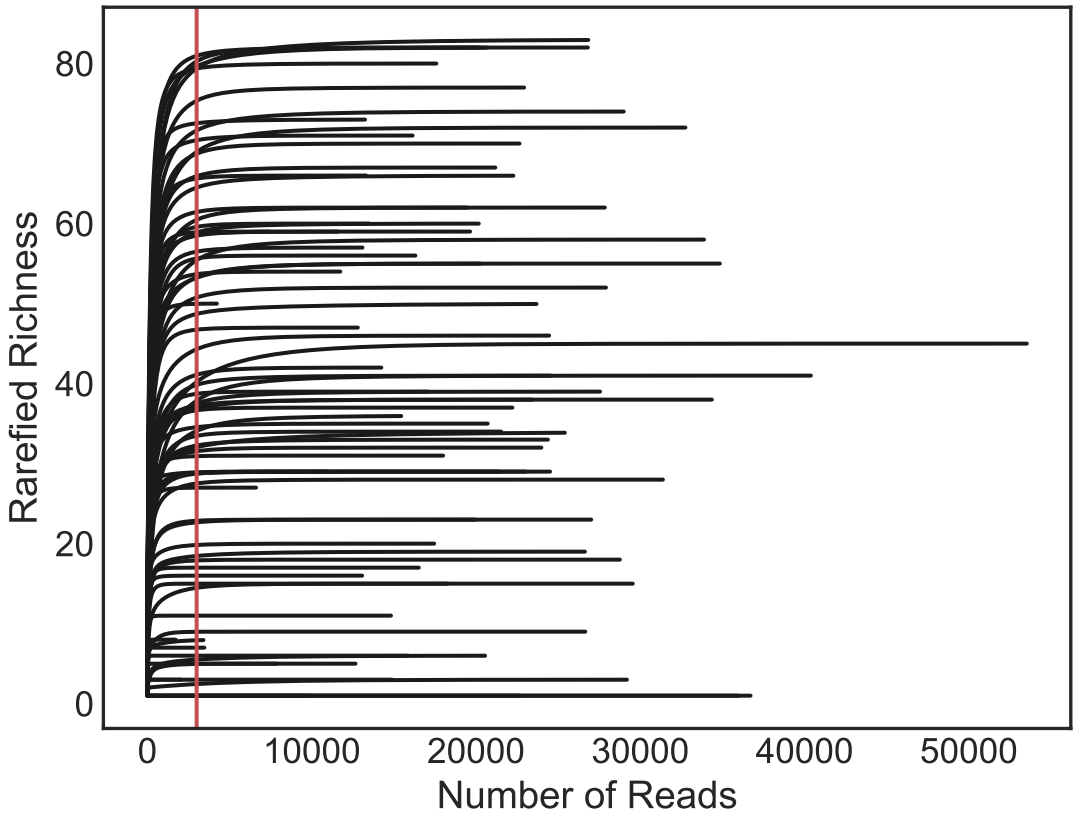

Supplement: msystems.01254-22-s0001.pdf [file msystems.01254-22-s0001.pdf]
